# Supplementary material for: Self-amplifying loop of NF-κB and periostin initiated by PIEZO1 accelerates mechano-induced senescence of nucleus pulposus cells and intervertebral disc degeneration
Source: PubMed Central journal article supplement — Mol Ther. 2022 May 26;30(10):3241–56. doi: 10.1016/j.ymthe.2022.05.021 (PMC9552911; doi:10.1016/j.ymthe.2022.05.021), 2022-05-26
Supplement: mmc1.pdf [file mmc1.pdf]

## **Supplemental Information**

**Self-amplifying loop of NF- $\kappa$ B and periostin  
initiated by PIEZO1 accelerates mechano-  
induced senescence of nucleus pulposus  
cells and intervertebral disc degeneration**

**Jinna Wu, Yuyu Chen, Zhiheng Liao, Hengyu Liu, Shun Zhang, Dongmei Zhong, Xianjian Qiu, Taiqiu Chen, Deying Su, Xiaona Ke, Yong Wan, Taifeng Zhou, and Peiqiang Su**

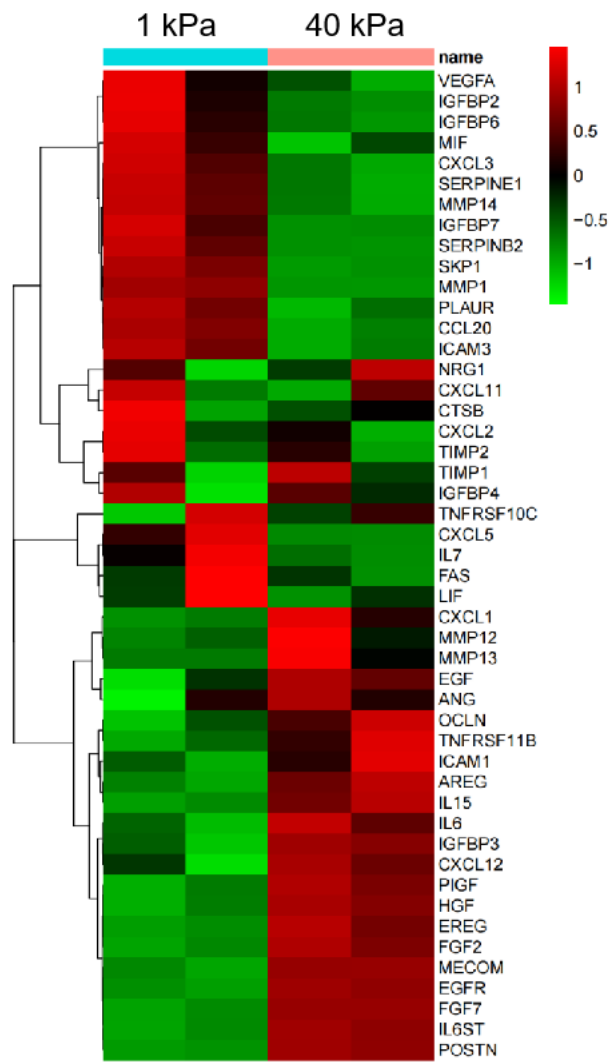

**Supplemental Figure 1.** Heatmap of the expression of cytokines and secretory proteins in 1 kPa and 40 kPa hNPCs.

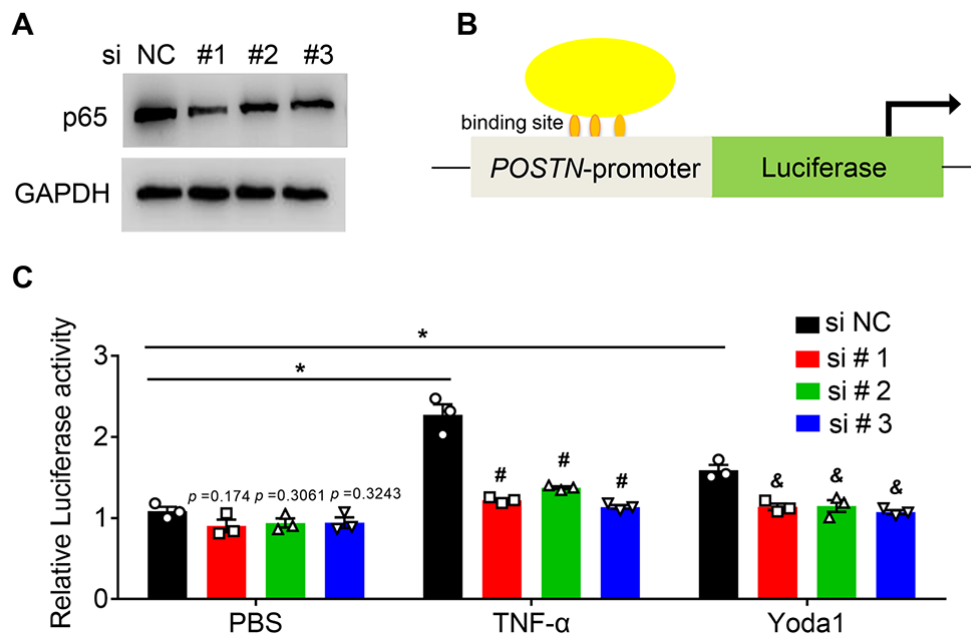

**Supplemental Figure 2.** **A.** Immunoblotting of p65 in hNPCs transfected with siRNAs targeting p65 for 48 h. **B.** The schematics of the *POSTN* promoter dual-luciferase reporter assay. **C.** The dual-luciferase reporter assay in hNPCs were conducted after transfection with siRNAs targeting p65 and firefly luciferase constructs containing the *POSTN* promoter (-2042 to -1 bp), followed by treatment with PBS, TNF- $\alpha$ , or Yoda1 for 24 h. Data were presented as the mean  $\pm$  SD. \*represented  $p < 0.05$ , compared to PBS group. #represented  $p < 0.05$ , compared to si NC + TNF- $\alpha$  group. &represented  $p < 0.05$ , compared to si NC + Yoda1 group.

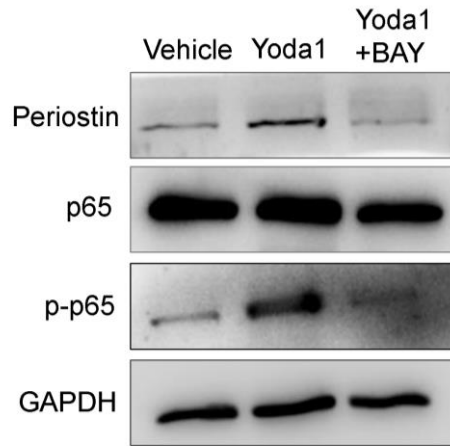

**Supplemental Figure 3.** Immunoblotting of periostin, p-p65, and p65 in hNPCs treated with vehicle, Yoda1, or Yoda1 and BAY for 24 h.

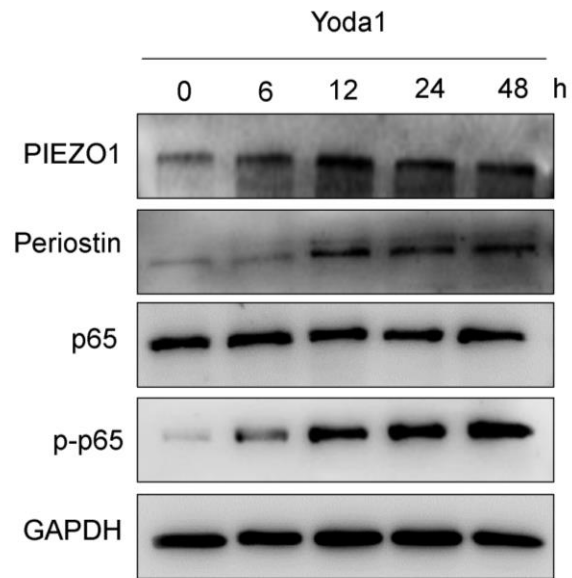

**Supplemental Figure 4.** Immunoblotting of PIEZO1, periostin, p-p65, and p65 in hNPCs treated with 5  $\mu$ M Yoda1 for different time periods.

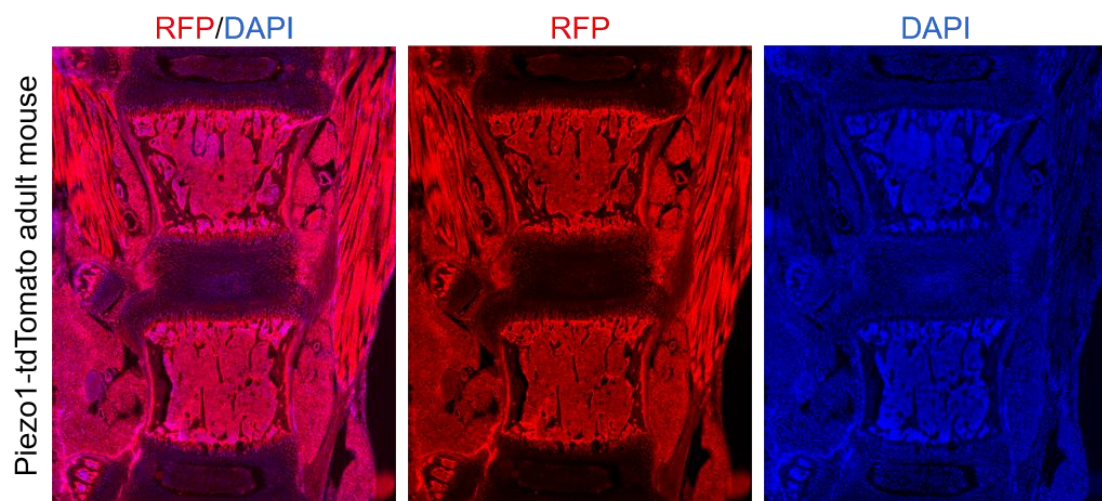

**Supplemental Figure 5.** Immunostaining of red fluorescent protein (RFP) and DAPI in the IVD of Piezo1-tdTomato adult mouse.

**Supplemental Table 1.** The sequences of siRNAs targeting p65.

| siRNA        | Sequences                                                                |
|--------------|--------------------------------------------------------------------------|
| p65-siRNA #1 | Forward: 5'-GAUUGAGGAGAAACGUAAA-3'<br>Reverse: 5'-UUUACGUUUCUCCUCAAC-3'  |
| p65-siRNA #2 | Forward: 5'-CCCACGAGCUUGUAGGAAA-3'<br>Reverse: 5'-UUUCCUACAAGCUCGUGGG-3' |
| p65-siRNA #3 | Forward: 5'-GCAUCCAGACCAACAACAA-3'<br>Reverse: 5'-UUGUUGUUGGUCUGGAUGC-3' |

**Video 1. Video of Ca<sup>2+</sup> influx in hNPCs after Yoda1 stimulation.** The fluorescence baseline was set using the first 10 s of the video. After 10 s, hNPCs were treated with 5  $\mu$ M Yoda1 and significant intracellular Ca<sup>2+</sup> influx was immediately observed. The fluorescence intensities of hNPCs decreased gradually over time.
